# Supplementary material for: Validation of an algorithm using inpatient electronic health records to determine the presence and severity of cirrhosis in patients with hepatocellular carcinoma in England: an observational study
Source: PubMed Central journal article supplement — BMJ Open. 2019 Jul 9;9(7):e028571. doi: 10.1136/bmjopen-2018-028571 (PMC6624046; doi:10.1136/bmjopen-2018-028571), 2019-07-09
Supplement: bmjopen-2018-028571supp001.pdf [file bmjopen-2018-028571supp001.pdf]

## Supplementary Tables

|                     |                        | True Status   |           | Total |
|---------------------|------------------------|---------------|-----------|-------|
|                     |                        | Non-cirrhotic | Cirrhotic |       |
| Cirrhosis Algorithm | Negative for Cirrhosis | 96            | 26        | 122   |
|                     | Positive for Cirrhosis | 2             | 165       | 167   |
|                     | Total                  | 98            | 191       | 289   |

Supplementary Table 1. 2 x2 Contingency table for cirrhosis identification by optimised algorithm version 4 with three years of follow-up.

| Time after HCC Diagnosis / days | Algorithm A<br>Variceal bleeding codes |           |      |           | Algorithm B<br>Variceal bleeding codes or treatment codes |           |      |           | Algorithm C<br>Variceal bleeding codes or treatment codes + UGIB |           |      |           |
|---------------------------------|----------------------------------------|-----------|------|-----------|-----------------------------------------------------------|-----------|------|-----------|------------------------------------------------------------------|-----------|------|-----------|
|                                 | Sens                                   | 95% CI    | Spec | 95% CI    | Sens                                                      | 95% CI    | Spec | 95% CI    | Sens                                                             | 95% CI    | Spec | 95% CI    |
| 0                               | 0.74                                   | 0.69-0.79 | 0.98 | 0.97-1.00 | 0.78                                                      | 0.73-0.83 | 0.96 | 0.94-0.98 | 0.76                                                             | 0.71-0.81 | 0.98 | 0.96-1.00 |
| 30                              | 0.76                                   | 0.71-0.81 | 0.99 | 0.97-1.00 | 0.80                                                      | 0.75-0.85 | 0.82 | 0.78-0.86 | 0.78                                                             | 0.73-0.83 | 0.98 | 0.96-1.00 |
| 60                              | 0.78                                   | 0.73-0.83 | 0.99 | 0.97-1.00 | 0.82                                                      | 0.76-0.86 | 0.96 | 0.94-0.98 | 0.80                                                             | 0.75-0.85 | 0.98 | 0.96-1.00 |
| 90                              | 0.78                                   | 0.73-0.83 | 0.98 | 0.96-1.00 | 0.82                                                      | 0.76-0.86 | 0.95 | 0.93-0.98 | 0.80                                                             | 0.75-0.85 | 0.97 | 0.95-0.99 |
| 120                             | 0.78                                   | 0.73-0.83 | 0.98 | 0.96-1.00 | 0.82                                                      | 0.76-0.86 | 0.95 | 0.93-0.98 | 0.80                                                             | 0.75-0.85 | 0.97 | 0.95-0.99 |

Supplementary Table 2. Performance of different versions of the Baveno stage algorithm for predicting decompensation. Sens = sensitivity, spec = specificity, UGIB = Upper gastrointestinal bleeding.

| Clinical Condition  | Algorithm A<br>Variceal bleeding codes |               |      |               |     | Algorithm B<br>Variceal bleeding codes or<br>treatment codes |               |      |               |         | Algorithm C<br>Variceal bleeding codes or<br>treatment codes + UGIB |               |      |               |     |
|---------------------|----------------------------------------|---------------|------|---------------|-----|--------------------------------------------------------------|---------------|------|---------------|---------|---------------------------------------------------------------------|---------------|------|---------------|-----|
|                     | Sens                                   | 95%<br>CI     | Spec | 95%<br>CI     | PPV | Sens                                                         | 95%<br>CI     | Spec | 95%<br>CI     | PPV (%) | Sens                                                                | 95%<br>CI     | Spec | 95%<br>CI     | PPV |
| Varices             | 0.76                                   | 0.71-<br>0.81 | 1.00 | 0.99-<br>1.00 | 92  | 0.62                                                         | 0.56-<br>0.67 | 1.00 | 0.99-<br>1.00 | 90      | 0.76                                                                | 0.71-<br>0.81 | 1.00 | 0.99-<br>1.00 | 96  |
| Bleeding<br>Varices | 0.31                                   | 0.25-<br>0.36 | 1.00 | 1.00-<br>1.00 | 80  | 0.92                                                         | 0.89-<br>0.95 | 0.96 | 0.94-<br>0.99 | 54      | 0.62                                                                | 0.56-<br>0.67 | 0.99 | 0.97-<br>1.00 | 67  |

Supplementary Table 3. Performance of different versions of the Baveno stage algorithm at 60 days post-HCC diagnosis for detecting varices and bleeding varices. Sens = sensitivity, spec = specificity, CI = confidence interval, PPV = positive predictive value.

| Clinical Condition | Ascites detection using Algorithm C<br>(ICD10 codes and OPCS4 codes) |               |      |               |         | Ascites detection using<br>ICD10 code R18.X only |               |      |               |         |
|--------------------|----------------------------------------------------------------------|---------------|------|---------------|---------|--------------------------------------------------|---------------|------|---------------|---------|
|                    | Sens                                                                 | 95%<br>CI     | Spec | 95%<br>CI     | PPV (%) | Sens                                             | 95%<br>CI     | Spec | 95%<br>CI     | PPV (%) |
| Ascites            | 0.73                                                                 | 0.68-<br>0.78 | 0.98 | 0.96-<br>0.99 | 73      | 0.57                                             | 0.51-<br>0.62 | 0.98 | 0.97-<br>1.00 | 84      |

Supplementary Table 4. Performance of ICD10 code R18.X for detection of ascites compared with the optimised algorithm C which includes additional OPCS4 codes for paracentesis (T46.1 and T46.2). Sens = sensitivity, spec = specificity, CI = confidence interval, PPV = positive predictive value.
